# Supplementary material
Source: PubMed Central journal article supplement (PMC5933391)
Supplement: jamasurg-153-313-s001.pdf [file jamasurg-153-313-s001.pdf]

## Supplementary Online Content

Howard BM, Holland CM, Mehta CC, et al. Association of overlapping surgery with patient outcomes in a large series of neurosurgical cases. *JAMA Surg*. Published online November 8, 2017.  
doi:10.1001/jamasurg.2017.4502

**eTable 1.** Demographic and summary data by subgroup of overlapping surgery

**eTable 2.** Surgical and outcomes data presented by subgroup of overlapping surgery

**eTable 3.** Bivariate analysis for factors associated with mortality, morbidity, and functional status

**eTable 4.** Multivariable logistic regression for covariates associated with mortality, morbidity, and unchanged poor (3-5) or worse mRS score at 90 days for patients who underwent only 1 operation

This supplementary material has been provided by the authors to give readers additional information about their work.

**eTable 1.** Demographic and summary data by subgroup of overlapping surgery

| Variable                                   | OS-R<br>N = 231   | OS-StS<br>N = 1072 | p-value |
|--------------------------------------------|-------------------|--------------------|---------|
| Patient Characteristics                    |                   |                    |         |
| Sex – n (%)                                |                   |                    |         |
| Female                                     | 141 (61)          | 613 (57)           | 0.28    |
| Male                                       | 90 (39)           | 459 (43)           |         |
| Age (years) – mean (SD)                    | 51.9 (16.7)       | 52.3 (16.2)        | 0.75    |
| ASA Score – n (%)                          |                   |                    |         |
| 1-2                                        | 68 (29)           | 344 (32)           | 0.43    |
| ≥ 3                                        | 163 (71)          | 728 (68)           |         |
| mRS at Baseline – n (%)                    |                   |                    |         |
| 0-2                                        | 176 (76)          | 879 (82)           | 0.04    |
| 3-5                                        | 55 (24)           | 193 (18)           |         |
| Surgery Characteristics                    |                   |                    |         |
| Operative Times (Min) -<br>Median (Q1, Q3) |                   |                    |         |
| In-room (Total)                            | 154 (120,<br>234) | 232 (163,<br>306)  | <0.001  |
| Skin-to-Skin                               | 78 (41, 148)      | 151 (89, 210)      | <0.001  |
| Surgical Staff – n (%)                     |                   |                    |         |
| Co-Surgeon Present                         | 32 (14)           | 271 (25)           | <0.001  |
| Fellow Present                             | 34 (15)           | 181 (17)           | 0.42    |
| Resident Present                           | 215 (93)          | 969 (90)           | 0.20    |
| Urgency – n (%)                            |                   |                    |         |
| Elective                                   | 215 (93)          | 969 (90)           | 0.37    |
| Emergent/Urgent                            | 16 (7)            | 103 (10)           |         |
| Admission Status – n (%)                   |                   |                    |         |
| Day Surgery                                | 70 (30)           | 146 (14)           | <0.001  |
| Admitted                                   | 161 (70)          | 926 (86)           |         |
| Surgery Category – n (%)                   |                   |                    |         |
| CSF Diversion                              | 17 (7)            | 62 (6)             | <0.001  |
| Vascular                                   | 78 (34)           | 227 (21)           |         |
| Functional                                 | 10 (4)            | 60 (6)             |         |
| Other                                      | 41 (18)           | 105 (10)           |         |
| Peripheral Nerve                           | 4 (2)             | 40 (4)             |         |
| Spine                                      | 58 (25)           | 421 (39)           |         |
| Tumor                                      | 23 (10)           | 157 (15)           |         |

ASA: American Society of Anesthesiologists, CSF: cerebrospinal fluid, mRS: Modified Rankin Scale, SD: Standard deviation, OS-R: Overlapping surgery in-room, OS-StS: Overlapping surgery skin-to-skin

**eTable 2.** Surgical and outcomes data presented by subgroup of overlapping surgery

| Variable                                                             | OS-R           | OS-StS         | p-value |
|----------------------------------------------------------------------|----------------|----------------|---------|
|                                                                      | (N = 231)      | (N = 1072)     |         |
| Operative Times (Min) - Median (Q1, Q3)                              |                |                |         |
| In-room (Total)                                                      | 154 (120, 234) | 232 (163, 306) | <0.001  |
| Skin-to-Skin                                                         | 78 (41, 148)   | 151 (89, 210)  | <0.001  |
| Length of Stay (Days) – Median (Q1, Q3)                              |                |                |         |
| ICU LOS                                                              | 1 (1, 2)       | 1 (1, 4)       | 0.19    |
| Overall LOS                                                          | 2 (0,4)        | 3 (1, 6)       | <0.001  |
| Discharge Location – n (%)                                           |                |                |         |
| Good Disposition (Home or AR)                                        | 221 (96)       | 1016 (95)      | 0.57    |
| Poor Disposition                                                     | 10 (4)         | 56 (5)         |         |
| Mortality – n (%)                                                    | 2 (1)          | 20 (2)         | 0.40    |
| mRS at Discharge – n (%)                                             |                |                |         |
| 0-2                                                                  | 169 (73)       | 804 (75)       | 0.56    |
| 3-6                                                                  | 62 (27)        | 268 (25)       |         |
| mRS at Follow-up vs Baseline – n (%)                                 |                |                |         |
| No                                                                   | 175 (76)       | 804 (81)       | 0.15    |
| Unchanged Poor (3-5) or Worse                                        | 54 (24)        | 268 (19)       |         |
| Morbidity within 90 Days – n (%)                                     |                |                |         |
| N                                                                    | 203 (87)       | 902 (86)       | 0.25    |
| Y                                                                    | 26 (11)        | 150 (14)       |         |
| Severity of Morbidity – n (%)                                        |                |                |         |
| Clavien 1 or 2                                                       | 10 (38)        | 50 (33)        | 0.61    |
| Clavien 3 or 4                                                       | 16 (62)        | 100 (67)       |         |
| 30-Day Readmission – n (%)                                           |                |                |         |
| N                                                                    | 205 (89)       | 984 (92)       | 0.14    |
| Y                                                                    | 26 (11)        | 88 (8)         |         |
| Unexpected Return to OR or Invasive Procedure within 90 days – n (%) |                |                |         |
| N                                                                    | 219 (95)       | 1010 (94)      | 0.73    |
| Y                                                                    | 12 (5)         | 62 (6)         |         |
| Surgical Site Infection – n (%)                                      |                |                |         |
| N                                                                    | 221 (96)       | 1031 (96)      | 0.72    |
| Y                                                                    | 10 (4)         | 41 (4)         |         |
| Multiple Related surgeries – n (%)                                   |                |                |         |
| N                                                                    | 228 (99)       | 1029 (96)      | 0.04    |
| Y                                                                    | 3 (1)          | 43 (4)         |         |

AR: Acute Rehabilitation, ICU: intensive care unit, LOS: Length of Stay, mRS: Modified Rankin Scale, OR: Operating room, Q1: First quartile, Q3: Third quartile

**eTable 3.** Bivariate analysis for factors associated with mortality, morbidity, and functional status

| Variable                                                             | Mortality      |                | p      | Morbidity      |                   | p      | mRS-90         |                  | p      |
|----------------------------------------------------------------------|----------------|----------------|--------|----------------|-------------------|--------|----------------|------------------|--------|
|                                                                      | No (N = 2222)  | Y (n = 53)     |        | No (N = 1892)  | Y (n = 324)       |        | No (N = 1762)  | Y (n = 459)      |        |
| Type of Overlap – n (%)                                              |                |                |        |                |                   |        |                |                  |        |
| No Overlap                                                           | 941 (42)       | 31 (58)        | 0.019  | 793 (42)       | 148 (46)          | 0.19   | 739 (42)       | 201 (44)         | 0.47   |
| Overlap                                                              | 1281 (58)      | 22 (42)        |        | 1105 (58)      | 176 (54)          |        | 1023 (58)      | 258 (56)         |        |
| Operative Times (Min) - Median (Q1, Q3)                              |                |                |        |                |                   |        |                |                  |        |
| In-room (Total)                                                      | 207 (134, 292) | 196 (155, 276) | 0.97   | 202 (126, 284) | 248 (170, 326.5)  | <0.001 | 208 (138, 292) | 201.5 (123, 292) | 0.49   |
| Skin-to-Skin                                                         | 130 (64, 197)  | 137 (97, 183)  | 0.57   | 124 (59, 191)  | 164.5 (97.5, 224) | <0.001 | 131 (66, 196)  | 122 (57, 207)    | 0.63   |
| Surgical Staff – n (%)                                               |                |                |        |                |                   |        |                |                  |        |
| Fellow Present                                                       | 423 (19)       | 16 (30)        | 0.04   | 349 (18)       | 74 (23)           | 0.06   | 351 (20)       | 72 (16)          | 0.04   |
| Resident Present                                                     | 2028 (91)      | 52 (98)        | 0.08   | 1725 (91)      | 303 (94)          | 0.12   | 1590 (90)      | 437 (95)         | <0.001 |
| Admitted to ICU                                                      | 928 (42)       | 51 (96)        | <0.001 | 723 (38)       | 205 (63)          | <0.001 | 727 (41)       | 201 (44)         | 0.33   |
| Discharge Location – n (%)*                                          |                |                |        |                |                   |        |                |                  |        |
| Good Disposition (Home or AR)                                        | 2112 (95)      | 1 (2)          | <0.001 | 1833 (97)      | 279 (86)          | <0.001 | 1721 (98)      | 390 (85)         | <0.001 |
| Poor Disposition                                                     | 110 (5)        | 52 (98)        |        | 65 (3)         | 45 (14)           |        | 41 (2)         | 69 (15)          |        |
| mRS at Discharge – n (%)                                             |                |                |        |                |                   |        |                |                  |        |
| 0-2                                                                  | 1653 (74)      | 1 (2)          | <0.001 | 1471 (77)      | 182 (56)          | <0.001 | 1601 (91)      | 51 (11)          | <0.001 |
| 3-5                                                                  | 569 (26)       | 52 (98)        |        | 427 (23)       | 142 (44)          |        | 161 (9)        | 408 (89)         |        |
| 30-Day Readmission – n (%)                                           |                |                |        |                |                   |        |                |                  |        |
| N                                                                    | 2012 (91)      | 52 (98)        | 0.06   | 1849 (97)      | 163 (50)          | <0.001 | 1597 (91)      | 414 (90)         | 0.77   |
| Y                                                                    | 210 (9)        | 1 (2)          |        | 49 (3)         | 161 (50)          |        | 165 (9)        | 45 (10)          |        |
| Unexpected Return to OR or Invasive Procedure within 90 days – n (%) |                |                |        |                |                   |        |                |                  |        |
| N                                                                    | 2064 (93)      | 53 (100)       | 0.05   | 1891 (100)     | 173 (53)          | <0.001 | 1650 (94)      | 413 (90)         |        |
| Y                                                                    | 158 (7)        | 0 (0)          |        | 7 (0)          | 151               |        | 112 (6)        | 46 (10)          |        |

|                                    |           |         |       |            |          |        |           |          |      |
|------------------------------------|-----------|---------|-------|------------|----------|--------|-----------|----------|------|
|                                    |           |         |       |            | (47)     |        |           |          |      |
| Surgical Site Infection – n (%)    |           |         |       |            |          |        |           |          |      |
| N                                  | 2128 (96) | 52 (98) | 0.72  | 1893 (100) | 235 (75) | <0.001 | 1697 (96) | 430 (94) | 0.01 |
| Y                                  | 94 (4)    | 1 (2)   |       | 5 (0)      | 89 (27)  |        | 65 (4)    | 29 (6)   |      |
| Multiple Related Surgeries – N (%) |           |         |       |            |          |        |           |          |      |
| N                                  | 2116 (96) | 51 (96) | >0.99 | 1840 (97)  | 276 (85) | <0.001 | 1689 (96) | 426 (93) | 0.01 |
| Y                                  | 106 (4)   | 2 (4)   |       | 58 (3)     | 48 (15)  |        | 73 (4)    | 33 (7)   |      |

AR: Acute Rehabilitation, ICU: intensive care unit, LOS: Length of Stay, mRS: Modified Rankin Scale, mRS-90: Unchanged Poor (3-5) or Worse mRS at 90 Days, OR: Operating room, Q1: First quartile, Q3: Third quartile

**eTable 4.** Multivariable logistic regression for covariates associated with mortality, morbidity, and unchanged poor (3-5) or worse mRS score at 90 days for patients who underwent only 1 operation

| Variable                                                        | Estimate | SE    | OR    | 95%CI        | p-value |
|-----------------------------------------------------------------|----------|-------|-------|--------------|---------|
| <b>Mortality</b>                                                |          |       |       |              |         |
| OS (ref: NOS)                                                   | 0.50     | 0.35  | 1.64  | 0.83 – 3.30  | 0.16    |
| Admitted to ICU (ref: no)                                       | 3.10     | 0.72  | 22.14 | 5.40 – 90.85 | <0.001  |
| Overall LOS (days)                                              | 0.04     | 0.01  | 1.04  | 1.02 – 1.07  | 0.002   |
| <b>Morbidity</b>                                                |          |       |       |              |         |
| OS (ref: NOS)                                                   | -0.21    | 0.12  | 0.81  | 0.64 – 1.04  | 0.09    |
| Discharge mRS 3-5 (ref: 0-2)                                    | -0.47    | 0.14  | 0.62  | 0.50 – 0.82  | 0.001   |
| Admitted to ICU (ref: no)                                       | 0.52     | 0.14  | 1.70  | 1.28 – 2.19  | <0.001  |
| Total In-Room Time (min)                                        | 0.002    | 0.001 | 1.00  | 1.00 – 1.00  | <0.001  |
| Overall LOS (days)                                              | 0.065    | 0.01  | 1.07  | 1.05 – 1.09  | <0.001  |
| <b>Unchanged Poor (3-5) or Worse mRS at 90 Days vs Baseline</b> |          |       |       |              |         |
| OS (ref: NOS)                                                   | -0.15    | 0.10  | 0.86  | 0.71 – 1.06  | 0.15    |
| Resident present (ref: no)                                      | 0.71     | 0.22  | 2.03  | 1.32 – 3.11  | 0.001   |
| Good disposition (ref: bad)                                     | -2.26    | 0.32  | 0.11  | 0.06 – 0.20  | <0.001  |
| Overall LOS (days)                                              | 0.03     | 0.01  | 1.03  | 1.01 – 1.05  | 0.001   |

Model included logit (PS) and used ATT weights. ICU: Intensive care unit, LOS: Length of Stay, mRS: Modified Rankin Scale, NOS: nonoverlapping surgery, OS: Overlapping surgery
